# Supplementary material for: Integrative Genomic and Computational Drug Discovery Approach to Unveil Key Pathways and Therapeutic Targets in Coronary Artery Disease
Source: Research Square preprint supplement (doi:10.21203/rs.3.rs-8072940/v1), 2025-11-12
Supplement: Supplementary file 1 [file 6a09c54e648ad00d1319197f.docx]

**Supplementary Table S1**.Binding affinity, Key amino acid interaction profile of screened phytoconstituents against EGR1 gene (pdb id: 4X9J) and SIRT1 gene (pdb id: 4I5I).

| **Compound** | **ERG1 gene (pdb: 4X9J) Amino acid interactions, Active Chain is A, standard ligand: AB1711** | | | | **SIRT1 gene (pdb: 4I5I) Amino acid interactions, Active Chains is A, cocrystallized ligand: 4I5** | | | |
| --- | --- | --- | --- | --- | --- | --- | --- | --- |
| **Affinity (kcal/mol)** | **Hydrogen bonding interactions** | **Electrostatic interactions** | **Hydrophobic interactions** | **Affinity (kcal/mol)** | **Hydrogen bonding interactions** | **Electrostatic interactions** | **Hydrophobic interactions** |
| Isocryptomerin | -8.4 | GLU121, THR152, HIS153 | ARG124, ARG174 | ILE128, PHE144 | -9.1 | THR368, SER365, GLU410 | GLU416, GLU410 | ALA367, PRO419, THR368 |
| Kolaflavanone | -7.1 | ARG142, LYS133 | ARG146 | PHE144, ILE128, ARG124 | -8.1 | GLU410 | GLU419 | PRO419, LYS377, THR368 |
| Irisflorentin | -6.6 | ARG174, THR152, SER145, LYS133 | ARG174, THR152 | THR152, HIS149, PHE144, HIS153 | -7.6 | LYS303, LYS375, CYS371, GLY364 | GLU410, GLU416 | VAL412, PRO419 |
| Cocrystallised \ standard ligand | -7.0 | SER145, ARG146, ARG124 | LYS133 | ILE128, ARG124 | -9.2 | PHE413, VAL412 | -- | HIS363, ILE411, PHE273, VAL445, PHE414, ILE347, ILE316PHE297 |
