# Supplementary material for: Integrative Genomic and Computational Drug Discovery Approach to Unveil Key Pathways and Therapeutic Targets in Coronary Artery Disease
Source: Research Square preprint supplement (doi:10.21203/rs.3.rs-8072940/v1), 2025-11-12
Supplement: Supplementary file 2 [file df17ba8e2154fc0acd03ce04.docx]

**Supplementary Table S2** ADMET and drug likeness properties of screened phytoconstituents

| **Parameter** | **Isocryptomerin** | **Kolaflavanone** | **Irisflorentin** |
| --- | --- | --- | --- |
| Molecular Weight (MW) | 552.11 g/mol | 588.13 g/mol | 542.12 g/mol |
| Topological Polar Surface Area (TPSA) | 159.8 | 203.44 Å² | 148.16 |
| Hydrogen Bond Donors (HBD) | 4 | 7 | 5 |
| Hydrogen Bond Acceptors (HBA) | 10 | 12 | 11 |
| Rotatable Bonds | 5 | 4 | 5 |
| Lipinski | MW > 500 Da | MW > 500 Da | MW > 500 Da |
| Veber | TPSA > 140 Å² | TPSA > 140 Å² | TPSA > 140 Å² |
| Log S (ESOL) | Poor | Moderate | Poor |
| Log Po/w (XLOGP3) | High | Balanced | High |
| Human Intestinal Absorption (HIA) | Very poor | Moderate | Very poor |
| Caco-2 Permeability | Low | Low | Low |
| BBB Permeant | No | No | No |
| P-gp Substrate | Moderate | Yes | No |
| CYP2C9 Inhibitor | Yes | No | Yes |
| CYP3A4 Inhibitor | Moderate | No | Yes |
| Half-life (T½) | Moderate | Moderate | Moderate |
| hERG Inhibitor | Not predicted | Not predicted | Not predicted |
| Hepatotoxicity | Not predicted | Not predicted | Not predicted |
| AMES Toxicity (Mutagenicity) | Not predicted | Not predicted | Not predicted |
| Carcinogenicity | Not predicted | Not predicted | Not predicted |
